# Supplementary material
Source: PubMed Central journal article supplement (PMC4922703)
Supplement: JCI82956.sd.pdf [file JCI82956.sd.pdf]

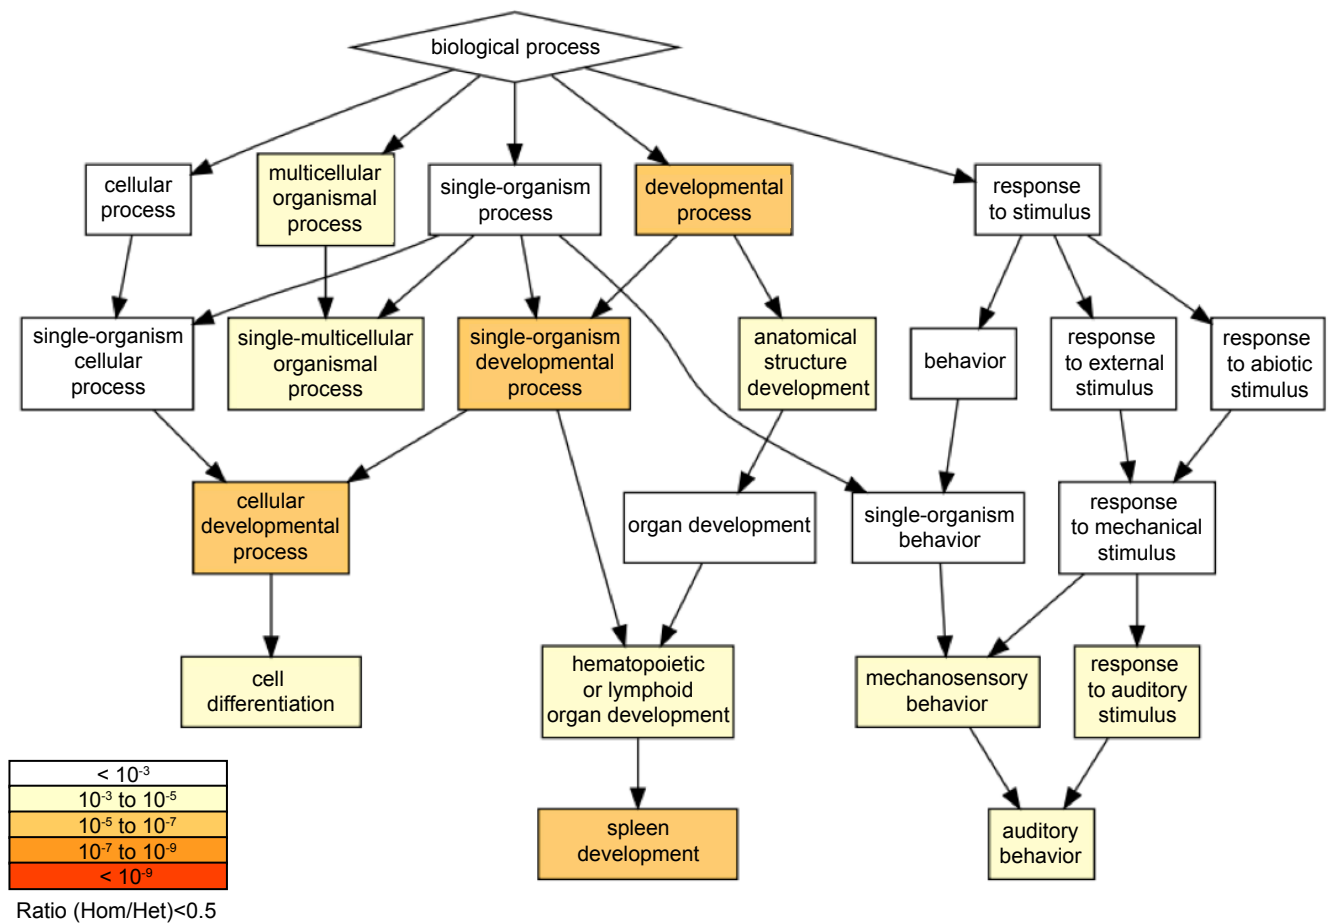

**Figure S1. Gene ontology analysis**

Selected gene ontology terms associated with the gene expression data showed significant differences in the expression of genes connected with developmental processes including spleen development. The color of each node illustrates its significance and is defined in the scale bar, which displays the false discovery rate on a log10 scale.

**A**

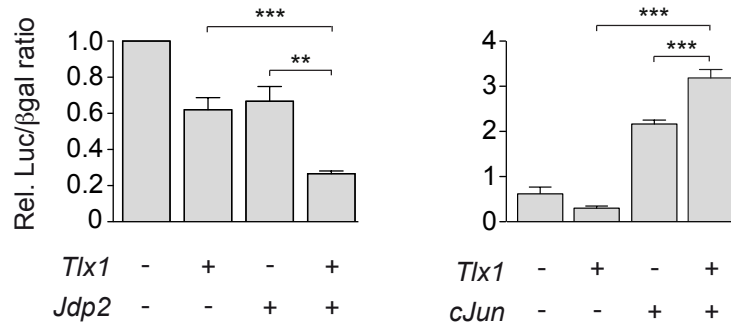

**B**

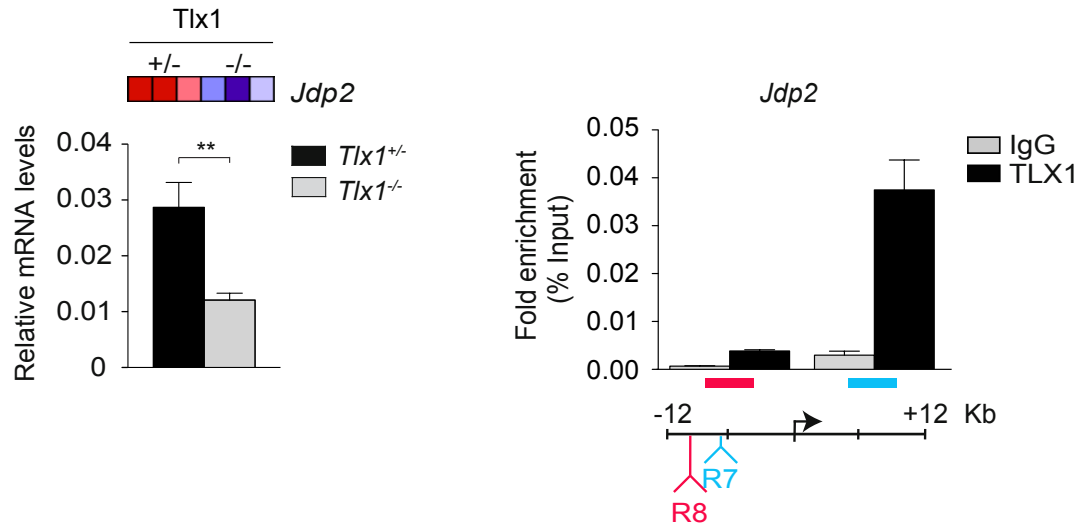

**C**

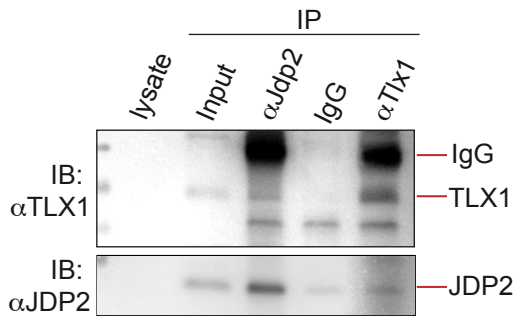

**Figure S2. TLX1 cooperates with the AP1 family member JDP2**

(A) Luciferase activity of an AP1-Luc reporter system was assessed at 48 hrs in NIH3T3 cells transiently transfected with *Tlx1* in combination with *Jdp2* or *cJun* expression vectors. The means of triplicates ± SD are shown, \*\*p<0.01 \*\*\*p<0.001(2-tailed Student’s t test). Data are representative of one out of three independent experiments.

(B) Heat map and validation of *Jdp2* expression by qPCRs in E13.5 *Tlx1*<sup>+/-</sup> and *Tlx1*<sup>-/-</sup> embryonic spleens. The means of triplicates ± SD are shown, \*\*p<0.01 (2-tailed Student’s t test). Data are representative of two independent experiments. ChIP-qPCR analysis of TLX1 binding to the *Jdp2* locus. Negative (R7) and positive (R8 and R9) regions are indicated relative to the gene locus. Data are normalized to the amplification of the input chromatin. Data are representative of one out of two different experiments.

(C) Protein extracts from 293T cells transiently expressing JDP2 and TLX1 were immunoprecipitated (IP) and immunoblotted (IB) with anti-JDP2, anti-TLX1 or control antibodies respectively. Data are representative of one out of two different independent experiments.

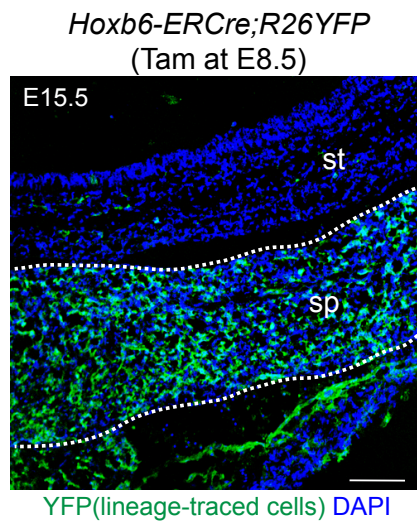

**Figure S3. Contribution of the LPM to the developing splenic mesenchyme**

Representative confocal images of E15.5 spleen sagittal sections from *HoxB6-ERCre;R26YFP* embryos injected with tamoxifen at E8.5 and stained with anti-YFP antibody to show the contribution of LPM cells of the *Hoxb6*<sup>+</sup> lineage (green, lineage-traced cells) to the developing spleen. Scale bars represent 100  $\mu$ m. Data are representative of one embryo out of 3 embryos analyzed. st, stomach; sp, spleen.

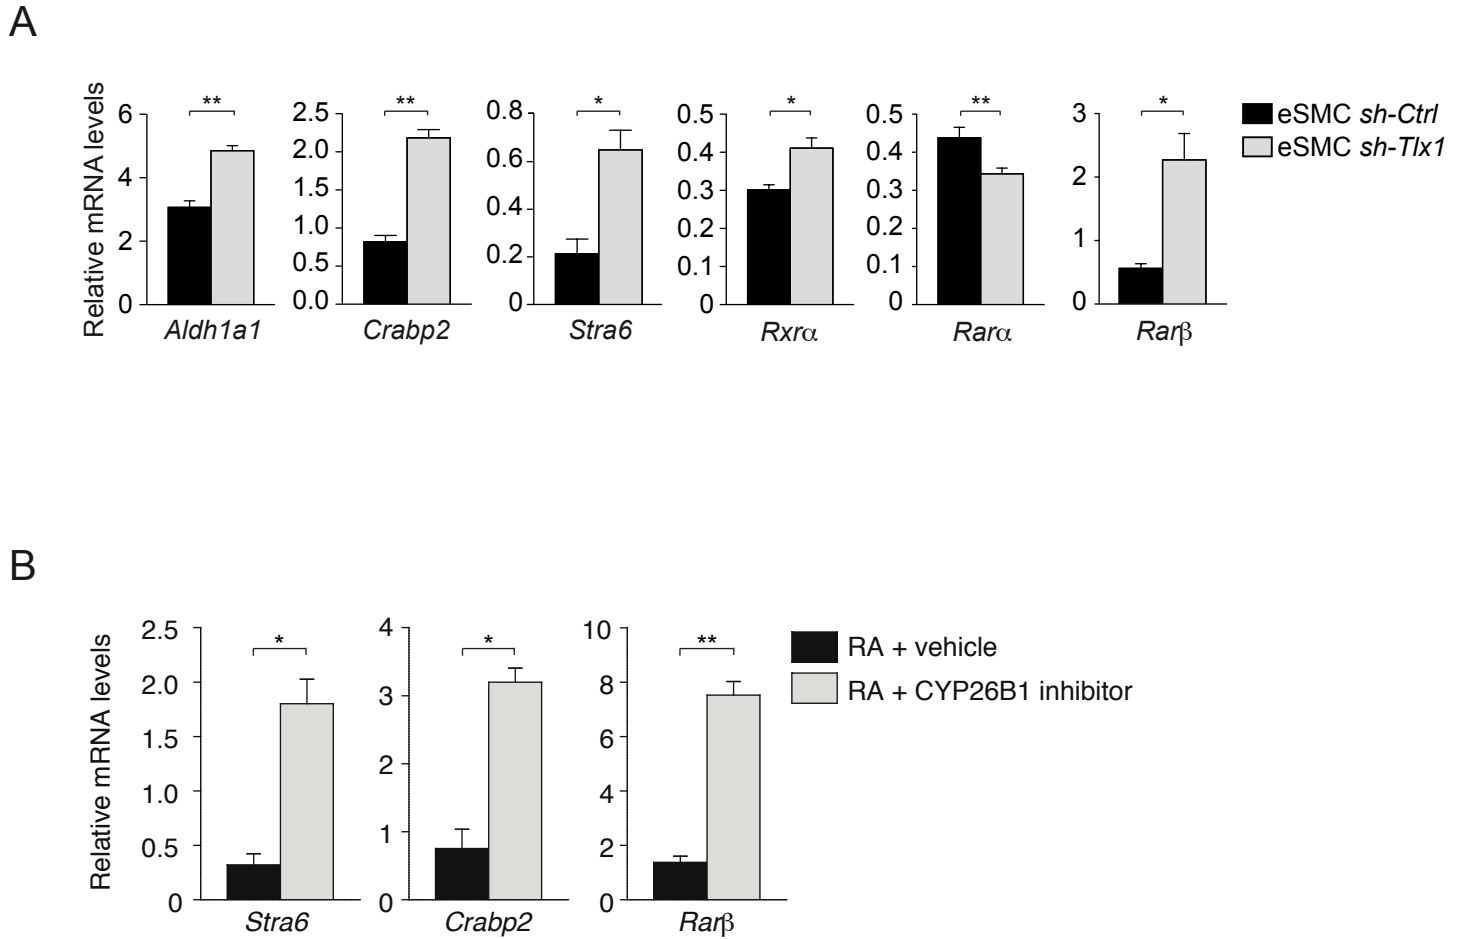

**Figure S4. Loss of CYP26B1 activity causes deregulation of the RA signaling pathway**

Expression of *Stra6*, *Crabp2* and *Rarb* by qPCR in eSMCs cultured for 24hrs in the presence of 1 $\mu$ M atRA + vehicle or 1 $\mu$ M atRA + 1 $\mu$ M R116010 (a Cyp26b1 inhibitor). The means of triplicates  $\pm$  SD are shown, \*\*\*p<0.001 (2-tailed Student's t test). Data are representative of one out of three independent experiments.

A

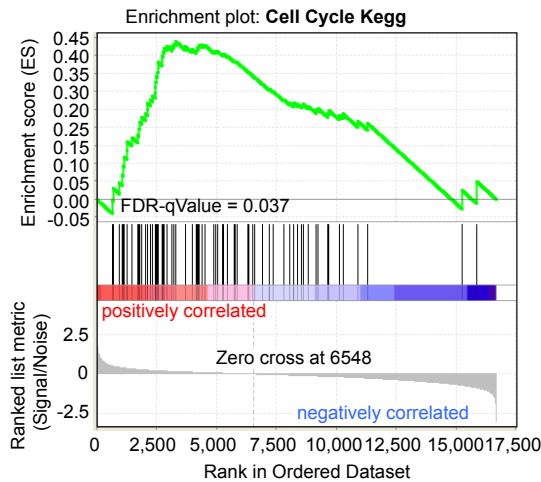

B

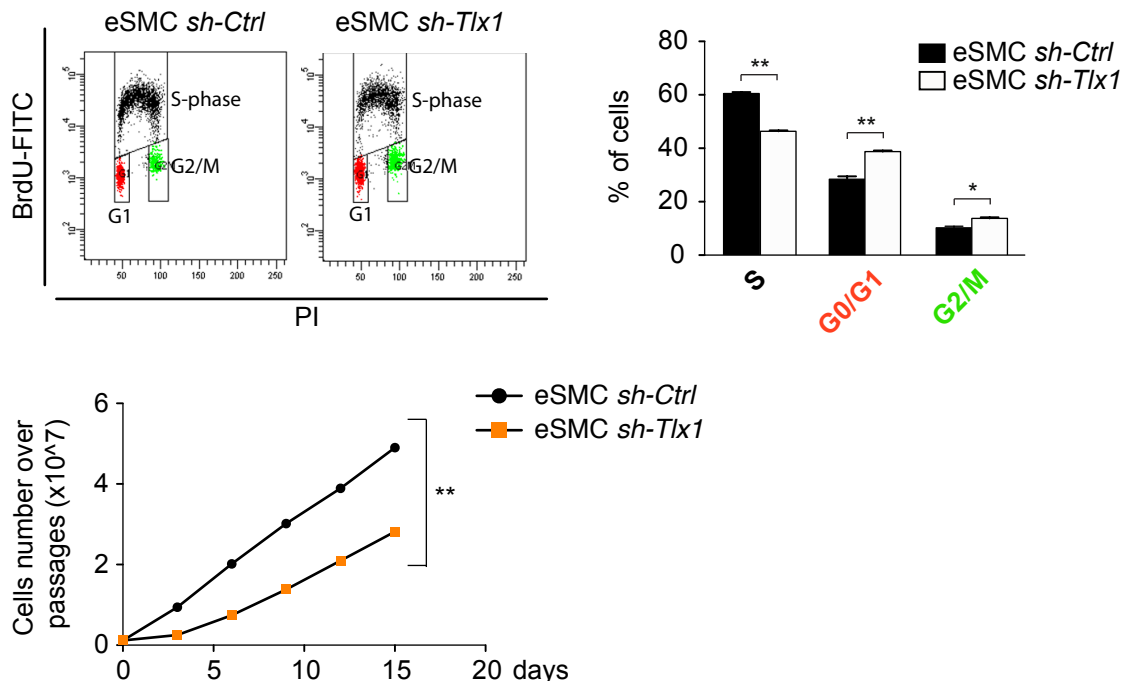

### Figure S5. Loss of *Tlx1* is associated with cell-cycle defects and reduced proliferation

A) GSEA enrichment plots of differentially expressed genes belonging to the Kegg-Cell Cycle pathway associated with loss of *Tlx1*.

B) BrdU analysis of asynchronous eSMCs line expressing *sh-Tlx1* or *sh-Ctrl* (upper panels). The means of triplicates  $\pm$  SD are shown, \* $p < 0.05$  \*\* $p < 0.001$  (2-tailed Student's t test). Data are representative of two independent silencing experiments. Growth curve analysis of *sh-Tlx1* (—■—) or *sh-Ctrl* (—●—) eSMCs (lower panel). The means of triplicates  $\pm$  SD are shown, \*\* $p < 0.01$  (2-way Anova). Data are representative of one out of three independent silencing experiments.

C) Validation of RA-associated genes by qPCR was performed in *sh-Ctrl* or *sh-Tlx1* eSMCs. The means of triplicates  $\pm$  SD are shown, \* $p < 0.05$  \*\* $p < 0.01$  (2-tailed Student's t test). Data are representative of one out of three independent silencing experiments.

A

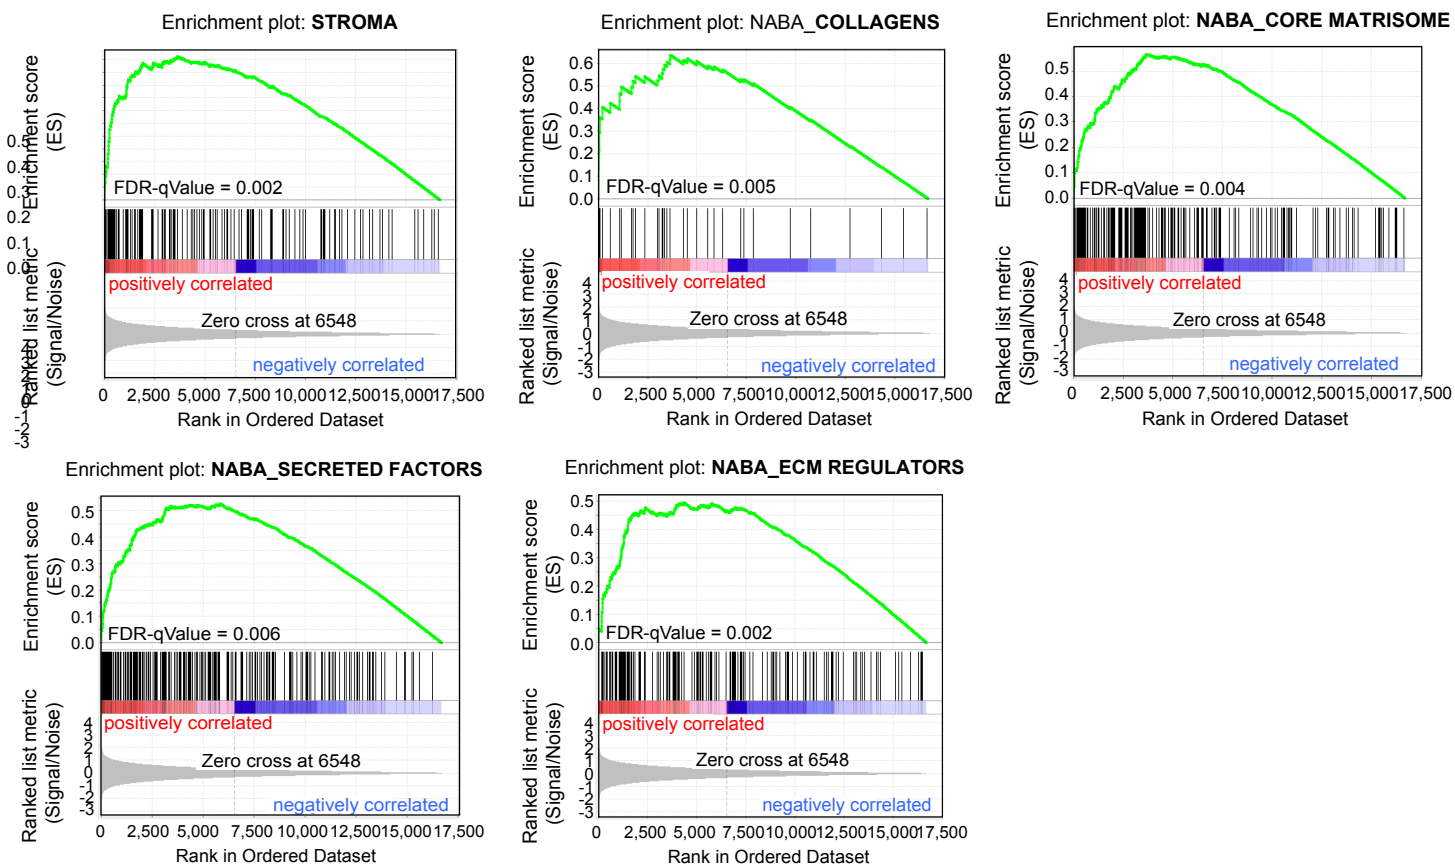

B

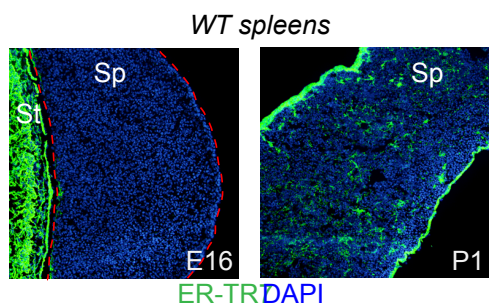

C

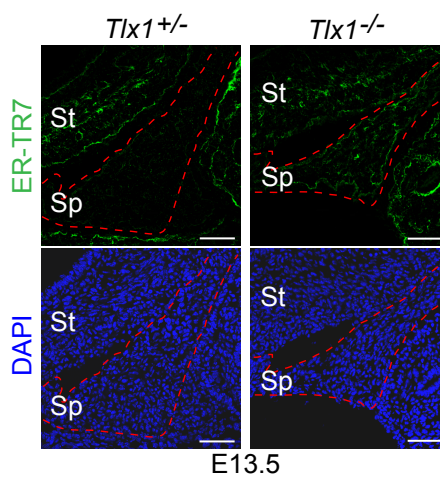

D

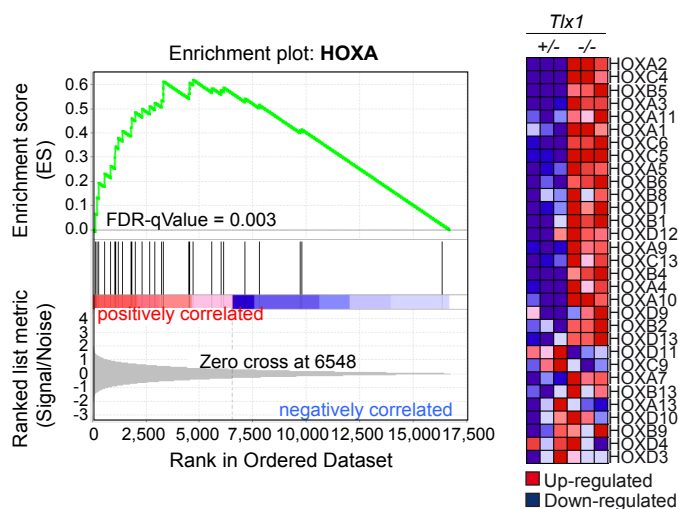

Figure S6. Lenti et al. 2016

**Figure S6. Loss of *Tlx1* promotes cellular differentiation**

(A) GSEA enrichment plots of differentially expressed genes of lymphoid stromal cells and ECM networks during differentiation associated with loss of *Tlx1*.

(B-C) Confocal images of E16 and P1 (B) and E13.5 (C) spleen sagittal sections stained with anti-ER-TR7 antibody (green). Nuclei are visualized by DAPI staining (blue). Dashed red lines indicated the developing spleen. Scale bars represent 50 $\mu$ m. St, stomach; sp, spleen. Data are representative of one embryo out of three analyzed for each genotype.

(D) GSEA enrichment plots and heat maps of differentially expressed genes belonging to the HOXA signature associated with loss of. The bar-code plot indicates the position of the genes on the expression data rank-sorted by its association with *Tlx1* mutants, with red and blue colors indicating over- and under-expression in the RNA.

## Supplemental Tables

**Supplemental Table 1.** AP-1 sequence in RA-associated genes deregulated in GSEA analysis

| GENE NAME | GENE ID      | CHROMOSOME | START     | END       | N. OF AP-1 SITES |
|-----------|--------------|------------|-----------|-----------|------------------|
| Rxrg      | NM_009107    | chr1       | 169508492 | 169528592 | 5                |
| Aldh3a1   | NM_007436    | chr11      | 61002243  | 61022343  | 7                |
| Rara      | NM_009024    | chr11      | 98779009  | 98799109  | 6                |
| Rara      | NM_001177302 | chr11      | 98779031  | 98799131  | 6                |
| Rara      | NM_001177303 | chr11      | 98781024  | 98801124  | 5                |
| Rarb      | NM_011243    | chr14      | 17407624  | 17427724  | 8                |
| Crabp2    | NM_007759    | chr3       | 87732614  | 87752714  | 3                |
| Adh5      | NM_007410    | chr3       | 138086127 | 138106227 | 4                |
| Aldh1a3   | NM_053080    | chr7       | 73572263  | 73592363  | 5                |
| Crabp1    | NM_013496    | chr9       | 54592614  | 54612714  | 8                |
| Stra6     | NM_001162475 | chr9       | 57956894  | 57976994  | 2                |
| Stra6     | NM_009291    | chr9       | 57957155  | 57977255  | 2                |
| Stra6     | NM_001162476 | chr9       | 57961881  | 57981981  | 1                |
| Stra6     | NM_001162479 | chr9       | 57962471  | 57982571  | 1                |
| Rbp1      | NM_011254    | chr9       | 98303379  | 98323479  | 2                |
| Rbp2      | NM_009034    | chr9       | 98370955  | 98391055  | 5                |
| Rarg      | NM_001042727 | chr15      | 102076683 | 102096783 | 4                |
| Rarg      | NM_011244    | chr15      | 102087814 | 102107914 | 2                |
| Rxrb      | NM_011306    | chr17      | 34148756  | 34168856  | 4                |
| Rxrb      | NM_001205214 | chr17      | 34148756  | 34168856  | 4                |
| Rxrb      | NM_001205215 | chr17      | 34149294  | 34169394  | 4                |
| Rbp4      | NM_001159487 | chr19      | 38199711  | 38219811  | 6                |
| Rxra      | NM_011305    | chr2       | 27512720  | 27532820  | 3                |
| Adh7      | NM_009626    | chr3       | 137860736 | 137880836 | 4                |
| Aldh1a2   | NM_009022    | chr9       | 71043595  | 71063695  | 2                |
| Rara      | NM_001176528 | chr11      | 98801784  | 98821884  | 2                |
| Aldh1a1   | NM_013467    | chr19      | 20656471  | 20676571  | 1                |



**Supplemental Table 2.** Sequence of Specific Primers and Probes Used for qPCR Analysis  
(Probe number corresponds to Universal Probe Library – Roche)

| <b>Gene</b>        | <b>Forward Sequence</b> | <b>Reverse Sequence</b> | <b>Probe N°</b> |
|--------------------|-------------------------|-------------------------|-----------------|
| <i>Tlx1</i>        | CGGGTGTCACAACCTCA       | CCGGTTCTGATAGGGGTGA     | #58             |
| <i>Cyp26b1</i>     | ACATCCACCGCAACAAGC      | GGGCAGGTAGCTCTCAAGTG    | #41             |
| <i>Raldh1</i>      | GCTGAACAAGCTGGCTGAC     | CCATTGAGTGCCTCCATTGTA   | #84             |
| <i>Stra6</i>       | GGAAGCCTGCAAGGTGAAT     | CCATGCTCCAGCTCTTCTTC    | #71             |
| <i>Rpb2</i>        | AGTGGGTGGAGGGAGACAA     | TGAACACTTGTCGGCACAC     | #1              |
| <i>Crabp2</i>      | TTGAGGAAATGCTAAAAGCTCTG | TCCTGTTTGATCTCGACTGCT   | #75             |
| <i>RARalpha</i>    | AGACACGCAGACGGGTTG      | GAGGATGCCACTCCCAGA      | #83             |
| <i>RARbeta</i>     | CACCGGCATACTGCTCAA      | CAAACGAAGCAGGGCTTG      | #63             |
| <i>RARgamma</i>    | TTTCCACCAGGTCCCTCAC     | CTGTCCAGTGGGTTTCCAAG    | #104            |
| <i>RXRalpha</i>    | AGGGGTGGCTGTGGGTAG      | TCTCCCTCCCTTCTTGAGTC    | #26             |
| <i>Jdp2</i>        | AAGAAGGAACGCACAGAGTTTC  | CGTCTTCAGCTCTGCGTTC     | #19             |
| <i>Desmin</i>      | GCCACCTACCGGAAGCTACT    | GCAGAGAAGGTCTGGATAGGAA  | #15             |
| <i>Vegf-A</i>      | ACTGGACCCTGGCTTTACTG    | TCTGCTCTCCTTCTGTCGTG    | #22             |
| <i>Laminin B1</i>  | TTGCGTGTGTTTGTGATCCT    | ATCCAGAGGCACAGTCATCA    | #50             |
| <i>Collagen4a1</i> | TTAAAGGACTCCAGGGACCAC   | CCCCTGAGCCTGTACAC       | #56             |
| <i>Nkx2-5</i>      | CGCCTTTCTCAGTCAAAGACA   | CAGACAGGTCCCCAGACG      | #1              |
| <i>Sfl</i>         | CCAGGAGTTCGTCTGTCTCAA   | GGCTGTGGTTGTTTCAGGAAT   | #41             |
| <i>Rpl13a</i>      | CCCTCCACCCTATGACAAGA    | GTAGGCTTCAGCCGAACAAC    | #108            |

**Supplemental Table 3.** Sequence of Specific Primers and Probes Used for qChIP Analysis  
(Probe number corresponds to Universal Probe Library – Roche)

| <b>Gene</b>         | <b>Forward Sequence</b> | <b>Reverse Sequence</b> | <b>Probe N°</b> |
|---------------------|-------------------------|-------------------------|-----------------|
| <i>CYP26b1 (R1)</i> | AGACGGGCTCTTTCTGTGAA    | GTCACCCAGTTCGCCAAA      | #25             |
| <i>CYP26b1 (R2)</i> | AGCGCCATCTCTTCGACA      | GATGGGGTATGGGCAGTG      | #5              |
| <i>RXRα (R3)</i>    | GCAAGGGAGAGCAGCACTT     | GGAGTTTGCTGGGTGCTTC     | #2              |
| <i>RXRα (R4)</i>    | GTCATGTTCCCACTCCAGAAC   | CCCAGGAAAGGGCAGGTA      | #67             |
| <i>RARα (R5)</i>    | GGAGCTGGGCAGTAGTGAGA    | GGCTTCAGTACTCAGGCTTCA   | #110            |
| <i>RARα (R6)</i>    | GGTGGGCTGATAGGCTCTG     | GGAACCCACCAAACCAAAAT    | #67             |
| <i>JDP2 (R7)</i>    | TGGGTCAGACTCTTTTCATGTG  | GCCAGTCTTCCCTAAGATTTGAT | #49             |
| <i>JDP2 (R8)</i>    | CAATGTGGAGACTCCCTCAAC   | GTCAGCCAGTGTGTGCTGTT    | #25             |





**Supplemental sequence 3. *RARα* 5' flanking region (from -9500bp to -3947bp)**

-9500bp      tctttgcagattgcctagccctccactccactccatctcacctagacagaaggtaacctgactgaaaaagtg  
 gtgagggcgctggaggggaccgtgctcctctgagggcttttcccttgcctcctggtgctccagcctggagctca  
 ggactttgctccactccctataaaggagcccaggtctcctccaggtgcaggacacactgggtgcccaagggttt  
 gcagaaagggtggagggttccgatgtttgctgacctgttcttagggaaagtccttcagctcagaactctcatcctg  
 ccaacacctcggccttagtcagaagccccctcgttagtgcccgttgaggacctatgtgtcagaagacctatac  
 attttgatggagggtactgtgtatccaagggagagattcccaggagggccaagccagatcaggctcagtcag  
 atggctggggaagggggtgtgaccagatctggaaggctgatcggctatgccagctccctgcactccatggctttag  
 agccttgactcctgggtgtactctggagctgagagggcctcaggcttgagctctcctcgggctccctgggagggaa  
 ctggatggcaccttctgttacagttgctgttctcctcctcctggtgggctgataggctctgttctggagatcagggg  
 ggcatcttatttggttgggtgggtccctatagagggctgggtgctgtctgagtaactagtagccttgtgtatcttcccc  
 tggggcagctgaacaggtaggagatagaggagtcttaacctcatagttgagctctggggacattgtgagggtgg  
 gtgacatgtacctgttggaaactagctgggtgtgtactctatcctcctcgtgttctcagggtcccctgatggttggctt  
 ggaggaatgttctagcatagaatggattctagacttagtctcctcaatgcagagagagtggtgggtgtgggatgagc  
 gacagactccaagcaaaaaggcctgactctgagagacttaactggttatatgcattatagcca-----  
 -----  
 -8399bp  
 -5011bp      ---  
 agtttgggtggagtgggggtggaggggctcaagggagaacaggctgccagccagaggtaggaggaggagcaggtg  
 ggtgaggagatgggtgagatgggggattgggtgacagcccacccattggctttgtaactcaatccccggccca  
 ccctcatgattcccctcctgctcaacaactcagcagctgctggcaggagtgtgtgtgtgttctgtgtgtgtgtgtgt  
 gtgtgtgtgtgcccacgcgagtgccgcacgcacgcgcatagggtgagaggggctgtggggcaggagcgtg  
 ccaggacatgtttaaaggaggctcattgcctggatacaactgggtggcaggaggggggtgggtaaatcggagagta  
 ggtgggtgagtgtggtggggagttggggcagacaggggcggggtgagaaggctgcaagggggcatcgcagccca  
 gctgaggggtctcactaaactcttagcactggggcagagctggtgccatggagctgggcagtagtgagaggacaga  
 ggctggcagagccacagttgaagcctgagctgaagccctgccttaccagggggcgcatgtaaccagggaggaca  
 ttgctgtggccctgtccctgatctgtaggtcatgctgctgggcagcacagccctggtagtactaagtcgcttctgtc  
 cccgggctggcaaagtaccagactcagctcttctctctcgttaggtgagctcctggtatcctcccgatgtgg  
 ctgagctacccggccatgccgcctggttaggtgggcatcactaggggttaggtggaggggtatactgtagcccc  
 agtgtcttctctatcttcttctcctagctctacccataaacctgcagagccagacgagcagagcagctgcttccc  
 ccacatgaggtaaaggaagagcagcaggtgagaatagagtggtgatgtttgatttggaaaggaaaatggggggg  
 agtgtgtgagttcaatcctacatctgcacctctgcaccgacaaactgtaagac

**RARa (R5) positive region**

**RARa (R6) negative region**

**AP-1 site**

**Supplemental sequence 4. *JDP2* 5' flanking region (from -9300bp to ATG)**

-9300bp      gagaccagcctggggtaccaagaggctgtgtcccctggcctcccaatggggtgggctctcat  
gtgtgagatcctgaggccagccagagaggctctcttacaggagggcattaatttcagccccactgtcagaag  
atgacagcagattgtcctgggtcacatgggtgggaagcgtctcctgtctctgaggggtcgttccatccatgacc  
**caatgtggagactccctcaactgagctggaggatattactctggaacagcacacactgctgacttcaggc**  
catgtgtctttaggaaaacttaggcgtcaaacctggctccctgcctggagcgggaagagcctcctagaagt  
gcaatcccaccctccccaccagagcccacacactagtccagtactaccctgcgcacctccaacactt  
ctctccaccacaccagggctgatgaggtcagaggaatgccacctcatggcagaaaacctggggggactt  
-8721bp      tcctcccttcataaacatttactgaaataactttctgctgatggtgttttaagacctgcagcagaaaagg-----  
-----  
-6260bp      ----  
tgactaacttaactgtgcaccatgagaaagcagttccaacggctcctgcatttagtctcacatcaggggtgagt  
ggcatttgatggacgagcaggaatagaagccgatgaagttccatggagccaattcagcattccttcaaagct  
tgactttggatatcttctgcctagatcctcagcattcttttagtggtgagtgcacaaaaaaaaaaaaaaaaaa  
aaaaaaaaaaccgaccaagctatgcttacaagacaggaagaggaggtgattcatcactacgggtgtct  
gaaggctgatcctgaacgtgcacgtgacagcttagactcgg**tgactca**aacgggtgaactcgtggctagtctct  
tcttaattgtctgaactttcttctctatagctagttcttct**gggtcagactctttcatgtgataggaaatggcc**  
-5662bp      **accaatagctgcaatctgtatgtctacaatgatagtttaaggaaacctctcttcttagtatcacttaatcaaatctt**  
**aggggaagactggc**tatttgggtcatggacctatccctgaaccgatctccacagtttgggacatgaactccc----  
-----  
-300bp      ----  
aaacccccgccatgctcctccgcgaaaaacaaaacaagcttgcgagatcctgcagcgtccgaagaca  
ccactgcgcggaacctcgtctggaattgggggagagcgcaccggacggaggaggatggttcggcgtgg  
gctgagctggaaggggttctgctcatccggccgcccctcgcgtcgtcctccgggctgtgtagcatttt  
gggggtggcgccgcaaggccgagcaggggatgcgcttacataaccgctcgcctgtcctgctcctcgcg  
0bp            ctctcgggagccgCGCGGGCGCGCCGCGGACCGCA**ATG**

**JDP2 (R7) positive region**

**JDP2 (R8) negative region**

**AP-1 site**
